# Supplementary material for: Myopalladin promotes muscle growth through modulation of the serum response factor pathway
Source: PubMed Central journal article supplement (PMC7015241; doi:10.1002/jcsm.12486), 2019-10-24
Supplement: JCSM-11-169-s001.pdf [file JCSM-11-169-s001.pdf]

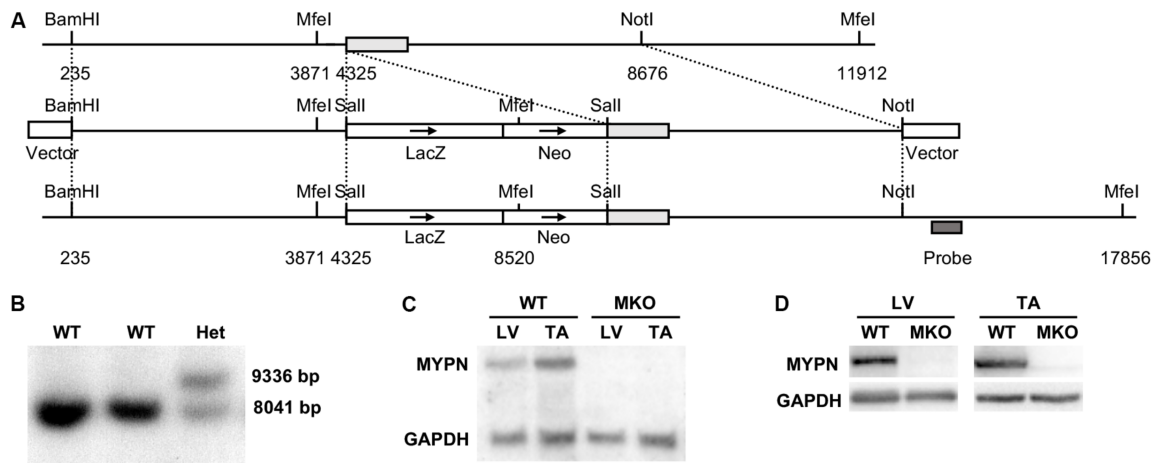

**Figure S1. Generation of myopalladin knockout (MKO) mice.** (A) Targeting strategy for generation of MKO mice. A restriction map of the relevant genomic region of *Mypn* is shown on top, the targeting construct is shown in the middle, and the mutated locus after recombination is shown at the bottom. The grey box indicates exon 1. Neo, neomycin resistance gene. (B) Detection of wild-type (WT) and targeted alleles by Southern blot analysis after digestion with *MfeI* using the probe shown in (A). Het, heterozygous. (C) Northern blot analysis showing the successful ablation of MYPN in left ventricle (LV) and *tibialis anterior* (TA) muscle from MKO and WT mice. (D) Detection of MYPN protein by Western blot analysis. GAPDH antibody was used as loading control.

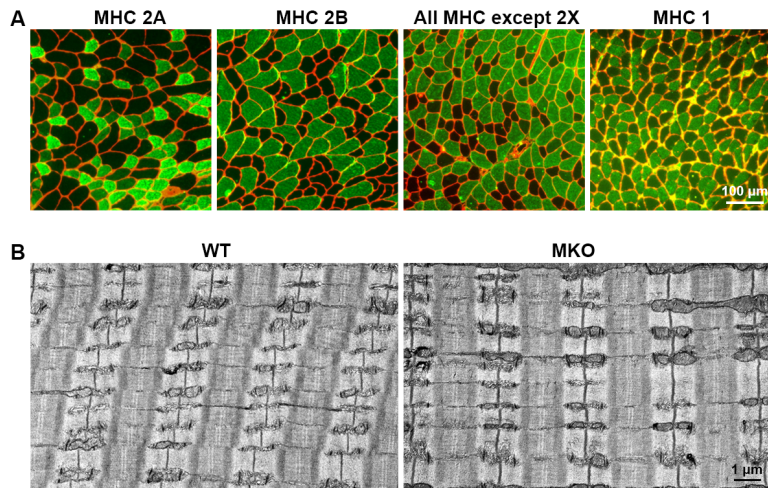

**Figure S2. Immunofluorescence and transmission electron microscopy analysis of myopalladin knockout (MKO) mice.** (A) Examples of immunofluorescence stainings for myosin heavy chain isoforms (MHC 2A, 2B, and all MHC isoforms except 2X; green) and laminin (red) on cryosectioned *extensor digitorum longus* (EDL) and soleus (MHC 1) muscle. (B) Low magnification transmission electron micrographs from EDL muscle of 8-month-old MKO and wild-type (WT) mice showing normal sarcomere organization.

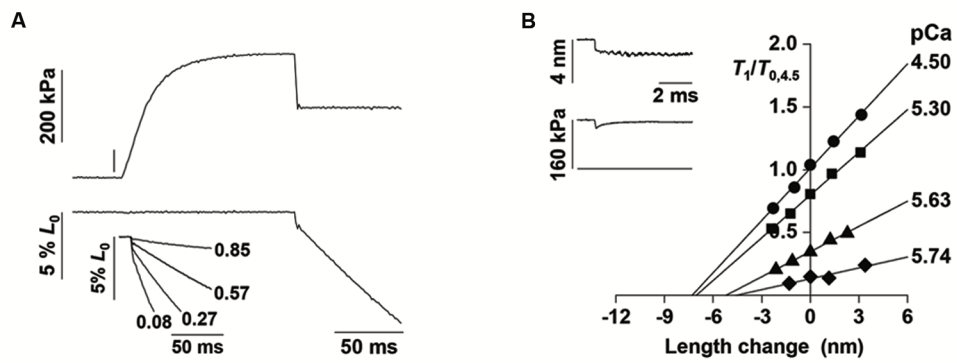

**Figure S3. Mechanical methods.** (A) Sample record of length change (lower trace) during isotonic contraction against a load of  $0.5 T_0$  (upper trace) from a wild-type (WT) *extensor digitorum longus* (EDL) muscle. The vertical line indicates the stimulus start. Inset, sample records of length changes during isotonic contraction against different loads as indicated by the values close to the traces. (B)  $T_1$  relations for four pCa values obtained from a single fibre of a WT EDL muscle. The relations were obtained by plotting the extreme force attained at the end of the length step,  $T_1$  (relative to  $T_0$  at pCa = 4.50) vs. the length step amplitude. Inset, force response (lower trace) to a length step release of 1 nm (upper trace) at pCa = 4.50 (horizontal line below force response, force baseline).

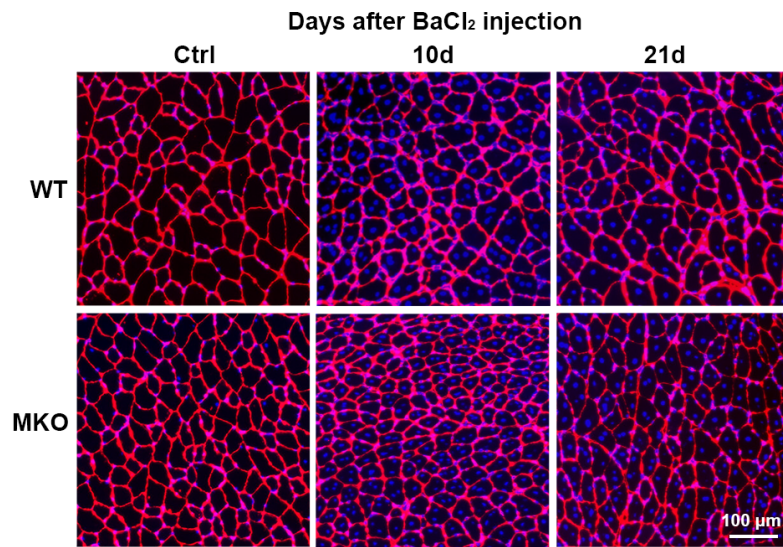

**Figure S4. Immunofluorescence analysis following BaCl<sub>2</sub> injection in mouse *tibialis anterior* (TA) muscle from myopalladin knockout (MKO) and wild-type (WT) mice.** Representative laminin (red) and 4', 6-diamidino-2-phenylindole (DAPI) (blue) stainings of cryosectioned TA muscle from BaCl<sub>2</sub>-injected muscle vs. control (Ctrl) muscle 10 and 21 days after injection of MKO and WT mice.

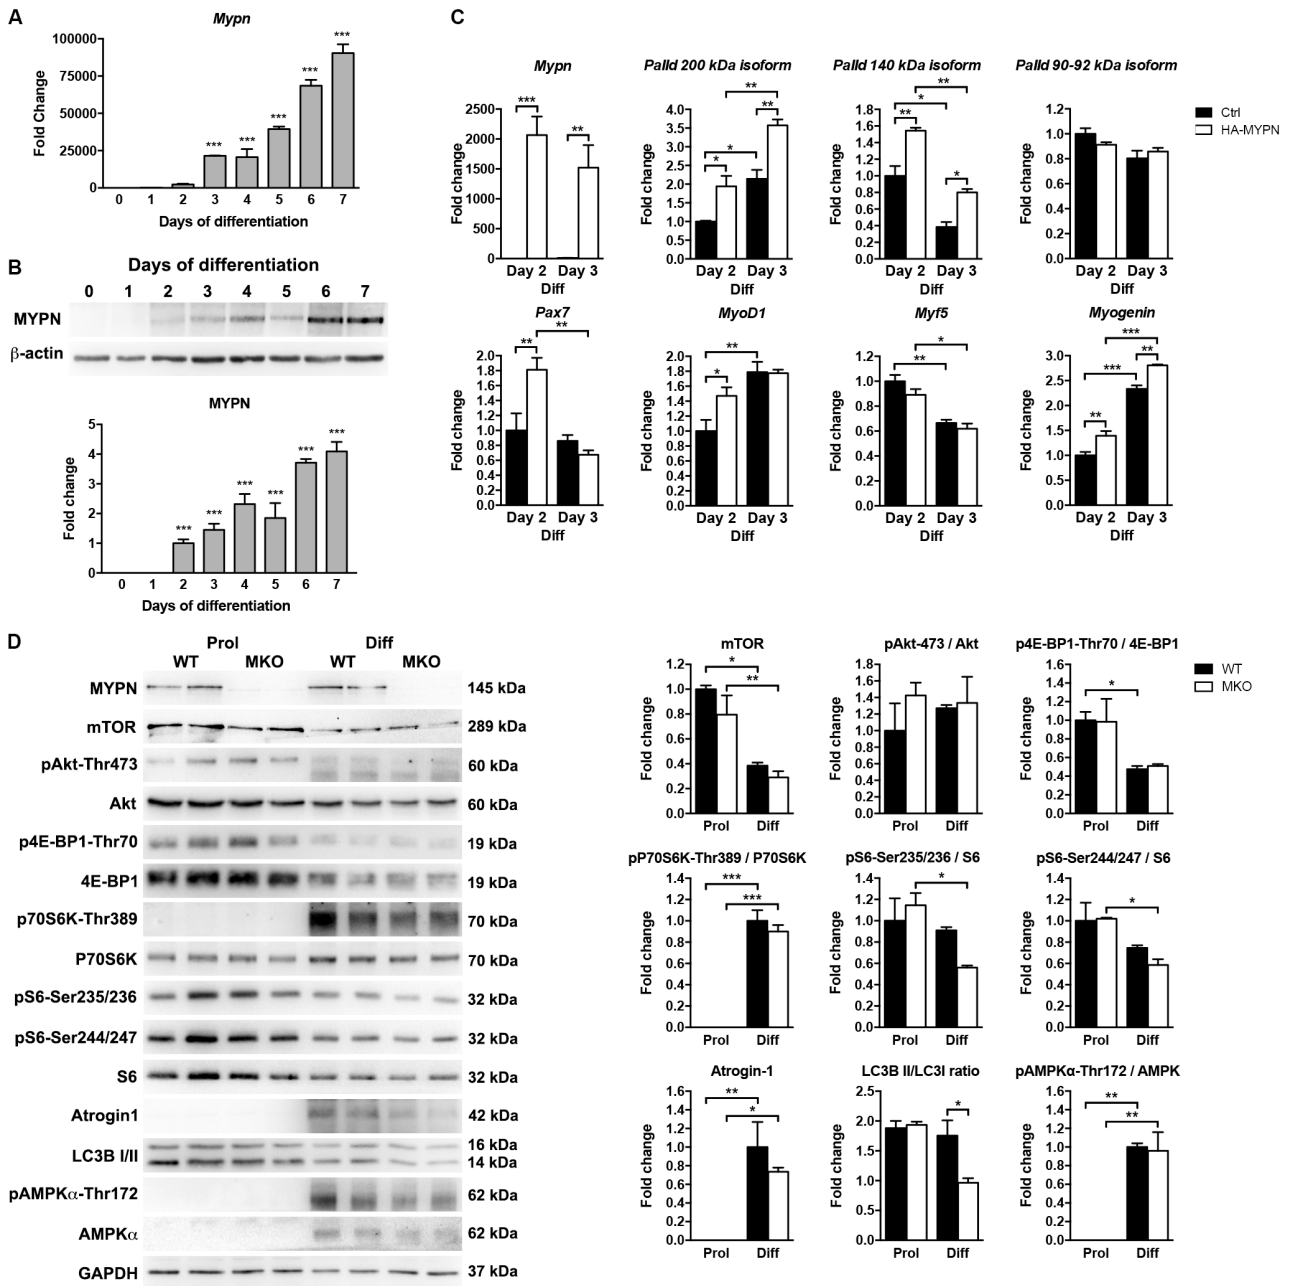

**Figure S5. Quantitative real-time PCR (qRT-PCR) and western blot analyses on C2C12 cells and primary myoblast cultures derived from myopalladin knockout (MKO) and wild-type (WT) mice.** (A) qRT-PCR analysis for *Mypn* on C2C12 cells during proliferation and at different stages following induction of differentiation.  $\beta$ -actin was used for normalization ( $n = 3$  per group from 3 independent experiments). Data are represented as mean  $\pm$  standard error of the mean (SEM). \*\*\* $P < 0.001$  vs. day 0 of differentiation; one-way analysis of variance (ANOVA). (B) Western blot and densitometric analysis for myopalladin (MYPN) on C2C12 cells during proliferation and at different stages following induction of differentiation. The blot is representative of 3 replicates per group.  $\beta$ -actin was used as loading control. Data are represented as mean  $\pm$  SEM. \*\*\* $P < 0.001$  vs. day 0 of differentiation; one-way ANOVA. (C) qRT-PCR on C2C12 cells 2 and 3 days after transfection with MYPN or control vector for quantification of levels of *Mypn* and *Pallid* transcripts, encoding the most common palladin (PALLD) isoforms, as well as myogenic markers ( $n = 3$  replicates per group from 3 independent experiments). GAPDH was used for normalization. Data are represented as mean  $\pm$  SEM. \* $P < 0.05$ , \*\* $P < 0.01$ , \*\*\* $P < 0.001$ ; two-way ANOVA. (D) Western blot and densitometric analyses for proteins involved in muscle growth and atrophy on cell lysate from proliferating (Prol) and differentiating (Diff) myoblasts derived from MKO and WT mice. The blots are representatives of 3 replicates per group from 3 independent experiments. GAPDH was used as loading control. Data are represented as mean  $\pm$  SEM. \* $P < 0.05$ ; \*\* $P < 0.01$ ; \*\*\* $P < 0.001$ ; two-way ANOVA.

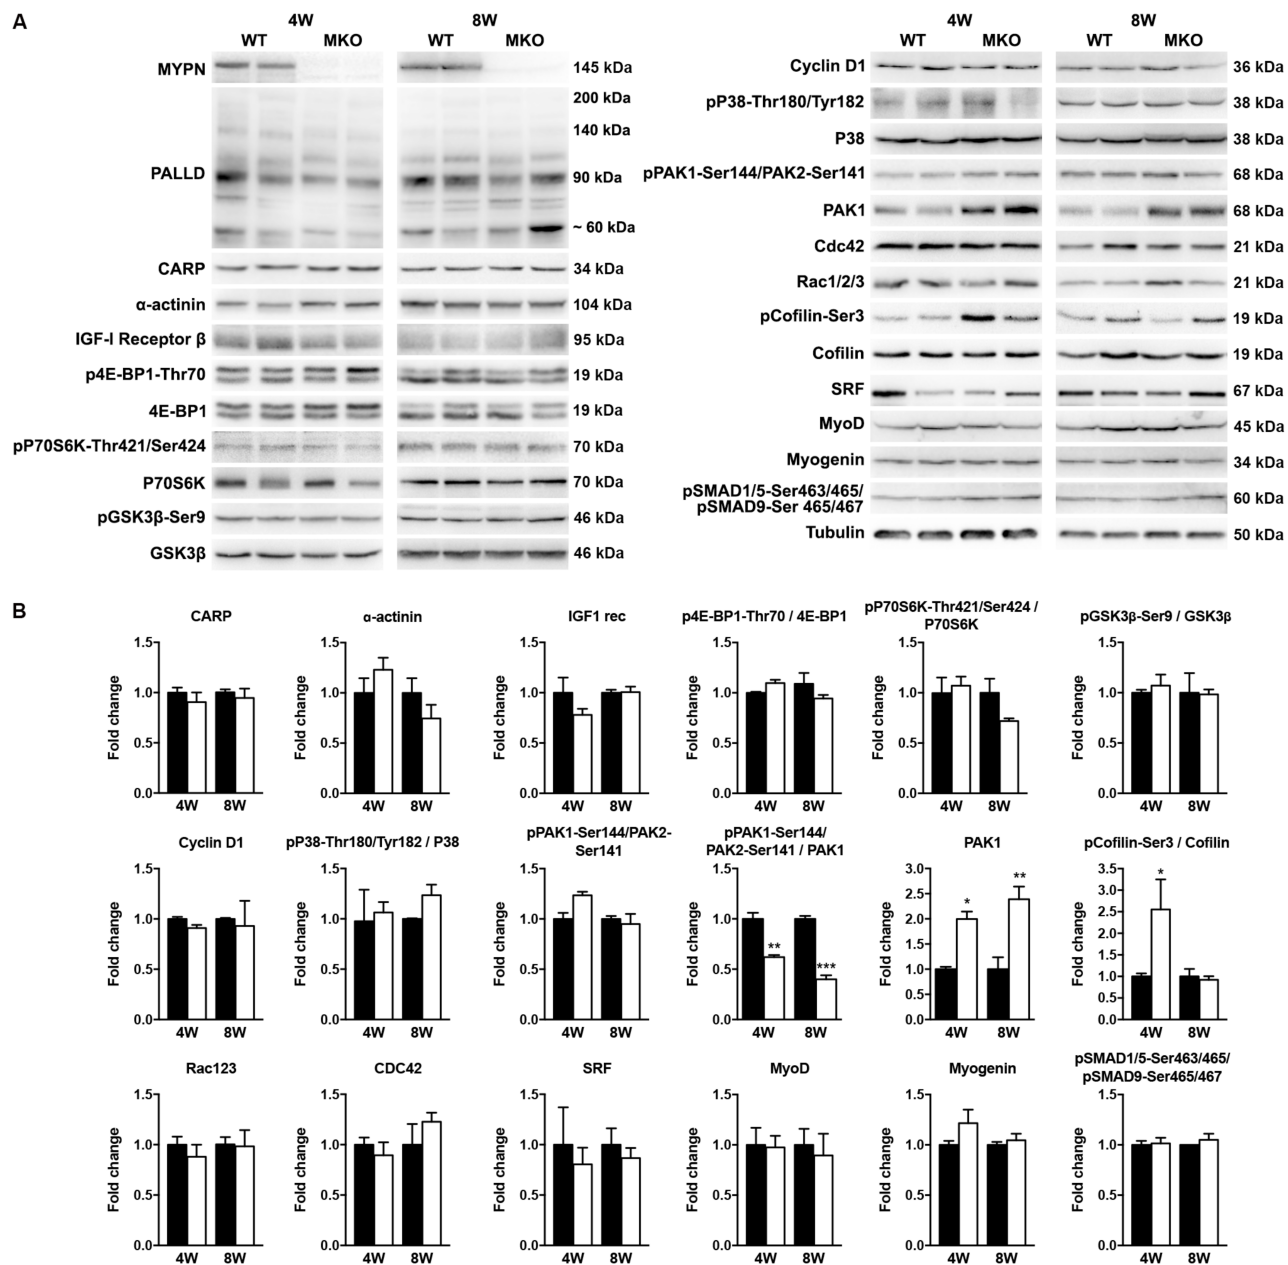

**Figure S6. Western blot analysis on *tibialis anterior* (TA) muscle from myopalladin knockout (MKO) and wild-type (WT) mice.** (A) Western blot analyses on TA muscle lysate from 4- and 8-week-old MKO and WT littermate control mice for myopalladin (MYPN)-interacting proteins and proteins involved in muscle signaling pathways.  $\alpha$ -Tubulin was used as loading control. The blots are representatives of 3 replicates per group. (B) Densitometric analysis. Data are represented as mean  $\pm$  standard error of the mean. \* $P < 0.05$ , \*\* $P < 0.01$ , \*\*\* $P < 0.001$ ; Student's  $t$ -test.

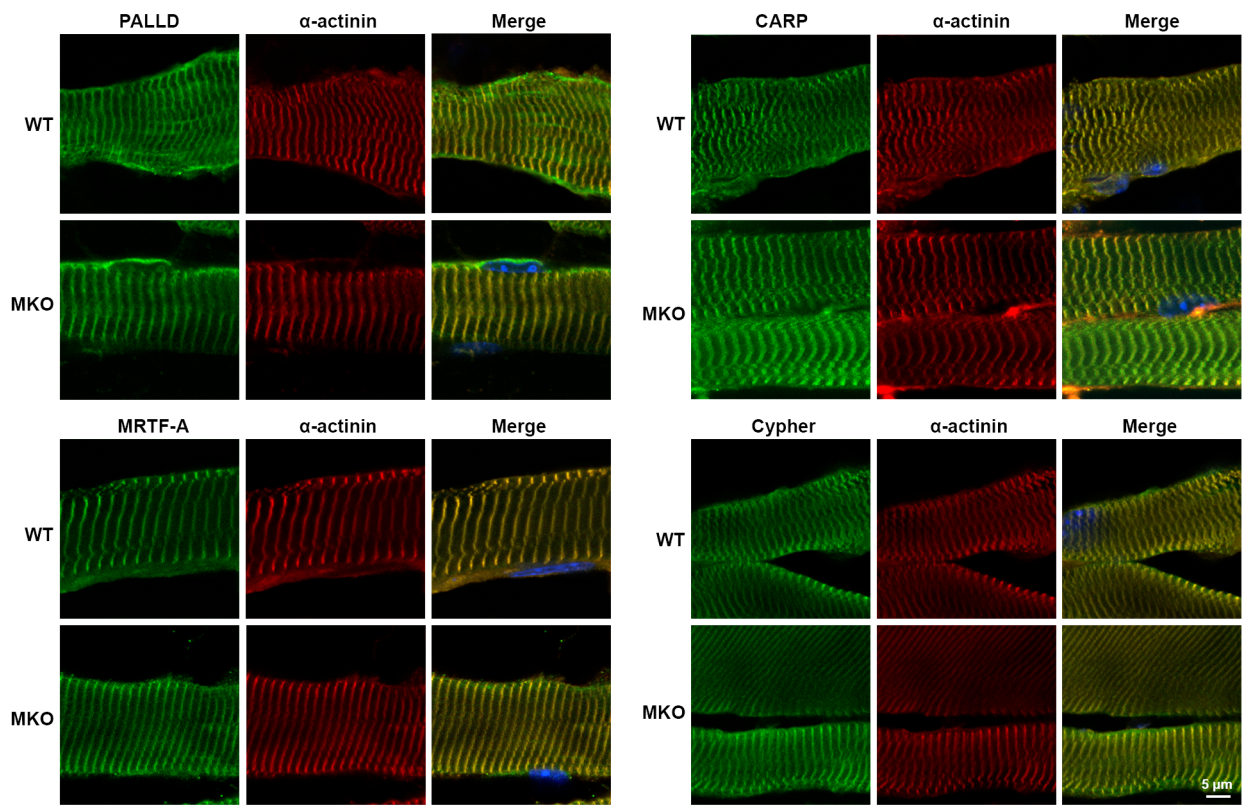

**Figure S7. Immunofluorescence stainings for myopalladin (MYPN)-interacting proteins on *tibialis anterior* (TA) muscle from 10-week-old myopalladin knockout (MKO) and wild-type (WT) mice. 4', 6-diamidino-2-phenylindole (DAPI) is shown in blue.**

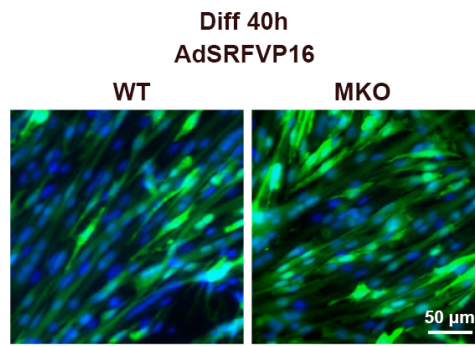

**Figure S8. Efficient Ad-SRF-VP16 infection of myoblasts.** Fluorescence microscopy picture of primary myoblast cultures 40 hours after infection with Ad-SRF-VP16 and induction of differentiation, showing that the cells were efficiently infected. 4', 6-diamidino-2-phenylindole (DAPI) is shown in blue.



**Table S1. Oligos used for quantitative real-time PCR (qRT-PCR) and clonings.**

| Primers                                               | Sense                                              | Reverse                                            |
|-------------------------------------------------------|----------------------------------------------------|----------------------------------------------------|
| <b>qRT-PCR</b>                                        |                                                    |                                                    |
| <i>Mypn</i>                                           | CATGCTTTGCTTCCACATT                                | GGCTTCTGGATTTCGATTCAT                              |
| <i>Palld</i> 200 kDa                                  | CATCCAGAACTGAGGAGCC                                | AGCTTTCGCTGTCAGAGTCC                               |
| <i>Palld</i> 140 kDa                                  | TGCTGCCTGTGCATTTTCCC                               | AGCTTTCGCTGTCAGAGTCC                               |
| <i>Palld</i> 90 kDa                                   | AGGAGCCCTCGACACCCA                                 | TCCTGTTCCAGGCGCACTTGG                              |
| <i>Ankrd1</i>                                         | GCTGGAGCCCAGATTGAA                                 | CTCCACGACATGCCAGT                                  |
| <i>Ankrd2</i>                                         | CGTGAGACTCAACCGCTACA                               | GCAGGCAGTCATAGTAGGG                                |
| <i>Pax7</i>                                           | GGCACAGAGGACCAAGCTC                                | GCACGCCGGTFACTGAAC                                 |
| <i>Myf5</i>                                           | CTGCTCTGAGCCCACCAG                                 | GACAGGGCTGTACATTCAGG                               |
| <i>Myod1</i>                                          | AGCACTACAGTGGCGACTCA                               | GGCCGCTGTAAATCCATCAT                               |
| <i>Myog</i>                                           | GAGATCCTGCGCAGCGCCAT                               | CCCCGCCTCTGTAGCGGAGA                               |
| <i>Sln</i>                                            | CTGAGGTCTTGGTAGCCTG                                | AAGCTAAGGCTCACTGGCTG                               |
| <i>Pak1</i>                                           | TGTCTGAGACCCCAGCAGTA                               | CCCGAGTTGGAGTAACAGGA                               |
| <i>Srf</i>                                            | GCTTACCAGATGGCTGTGATA                              | AATAAGTGGTGCCGTCCCTTG                              |
| <i>Mrtfa</i>                                          | ATGACATGAAGGTGGCAGAG                               | TGACTTGGTCTTGGTAGGCA                               |
| <i>Acta1</i>                                          | AATGAGCGTTTCCGTTGC                                 | ATCCCCGAGACTCCATAC                                 |
| <i>Acta2</i>                                          | CTGACAGAGGCACCAGTAA                                | CATCTCCAGAGTCCAGCACA                               |
| <i>Actc1</i>                                          | TGCCGATCGTATGCAAAAAGG                              | GGCCTGCCTCATCATACTCT                               |
| <i>Ctgf</i>                                           | TGACCTGGAGGAAAACATTAAGA                            | AGCCCTGTATGTCTTCACTG                               |
| <i>Cacna2d4</i>                                       | CAGGTGAGGTCTCCAAGAGC                               | TGTGTTCACTTGGGCATTGT                               |
| <i>Myf9</i>                                           | GATAAGGAGGACCTGCACGA                               | GGAACATGGTGAAGTTGATGG                              |
| <i>Myh4</i>                                           | ACAGACTAAAGTAAAAGCC                                | CTCTCAACAGAAAGATGGAT                               |
| <i>Gapdh</i>                                          | TGGCAAAGTGGAGATTGTTGCC                             | AAGATGGTGATGGGCTTCCCG                              |
| <b>Clonings</b>                                       |                                                    |                                                    |
| Pxj-40-mouse PALLD isoform 4 (res. 1-680; BC127081)   | atccaagcttctcgag/ATGAGCGCTCTGGCCTCCC               | agatctggtaccctgcagcc/TCACAGGTCTTCACTTTTACCAAGCC    |
| Pxj40-HA-mouse MYPN FL (res. 1-1315; NM_182992)       | atccaagcttctcgag/ATGCAAGAAGACAGCATAGAGGCATCCA      | agatctggtaccctgcagcc/TTAAAGTTCATCGCTCTCCACTACACTCC |
| Pxj40-HA-mouse MYPN C-term (res. 938-1315; NM_182992) | atccaagcttctcgag/TGCATCGCGCCCATCTTTGACAAAAGGCTCAAG | agatctggtaccctgcagcc/TTAAAGTTCATCGCTCTCCACTACACTCC |
| Pxj40-HA-mouse MYPN Ig3-4 (res. 938-1165; NM_182992)  | atccaagcttctcgag/TGCATCGCGCCCATCTTTGACAAAAGGCTCAAG | agatctggtaccctgcagcc/CTTCTTTACCTCTTTGGTACCACAGTCC  |
| Pxj40-HA-mouse MYPN Ig3 (res. 938-1040; NM_182992)    | atccaagcttctcgag/TGCATCGCGCCCATCTTTGACAAAAGGCTCAAG | agatctggtaccctgcagcc/TCGGCTTCGAATGGCAAACCTGTACCATC |
| PmCherry-N1-MYPN FL (res. 1-1315; NM_182992)          | ctcaagcttctcgatc/ATGCAAGAAGACAGCATAGAGGCATCCA      | ggcgaccgggtgatcccg/AAGTTCATCGCTCTCCACTACACTCC      |
| pTBMalE3-mouse MYPN Ig3-4 (res. 938-1165; NM_182992)  | tacttccaatccaatgca/TGCATCGCGCCCATCTTTGACAAAAG      | ttatccactccaatg/TTAACTCTTCTTTACCTCTTTGGTACCACAGTCC |
| pTBSG-mouse MYPN Ig3 (res. 940-1044; NM_182992)       | tacttccaatccaatgca/GCTCCCATCTTTGACAAGAGACTCAAGC    | ttatccactccaatg/TTAAGCAGAGGTTAGCCGACTGCGAAT        |
| pTBMalE3-mouse MYPN Ig4 (res. 1065-1165; NM_182992)   | tacttccaatccaatgca/TTTTCCGACCACATTTCTGCGAG         | ttatccactccaatg/TTAACTCTTCTTTACCTCTTTGGTACCACAGTCC |
| pGBKT7 human MYPN FL (res. 1-1320; NM_182992)         | tttcatatg/ATGCAAGACGACAGCATAGAGCTTCTACT            | tttggatcc/TTAAAGTTCATCACTCTCCACTACACTCCG           |
| pGBKT7 human MYPN C-term (res. 938-1320; NM_182992)   | tttcatatg/CCCACGGGCAAGTGTATTGCTCCATCTTT            | tttggatcc/TTAAAGTTCATCACTCTCCACTACACTCCG           |
| pGBKT7 human MYPN Ig3-4 (res. 944-1155; NM_182992)    | catggaggccgaattc/GCTCCCATCTTTGACAAGAGACTCAAGC      | gcaggtcgagcggatcccta/ATTCTGCCCGGTTTGTGGTAGCGATG    |
| pGBKT7-human MYPN Ig3 (res. 944-1048; NM_182992)      | catggaggccgaattc/GCTCCCATCTTTGACAAGAGACTCAAGC      | gcaggtcgagcggatcccta/AGCAGAGGTTAGCCGACTGCGAATG     |
| pGADT7-human MRTF-A/MKL1 FL res. 1-931 (NM_020831)    | ggaggccagtgatc/ATGCCGCCTTTGAAAA GTCCAGC            | cgagctcgatggatcccta/CTACAAGCAGGAATCC CAGTGCAAG     |
| pGADT7-human MRTF-A/MKL1 res. 1-169 (NM_020831)       | ggaggccagtgatc/ATGCCGCCTTTGAAAA GTCCAGC            | cgagctcgatggatcccta/ATCCCGGCCCATCG GAAGTTGAG       |
| pGADT7-human MRTF-A/MKL1 res. 170-931 (NM_020831)     | ggaggccagtgatc/TCCAGAGAAATGCTTT TCCTGGCAGAGC       | cgagctcgatggatcccta/CTACAAGCAGGAATCC CAGTGCAAG     |
| pGADT7-human MRTF-A/MKL1 res. 170-287 (NM_020831)     | ggaggccagtgatc/TCCAGAGAAATGCTTT TCCTGGCAGAGC       | cgagctcgatggatcccta/GGCCTGGTAGTTGT GGTGCTGC        |
| pGADT7-human MRTF-A/MKL1 res. 608-931 (NM_020831)     | ggaggccagtgatc/CACATAGACCCTTGTC CTGTGGCC           | cgagctcgatggatcccta/CTACAAGCAGGAATCC CAGTGCAAG     |
| pGADT7-human MRTF-A/MKL1 res. 288-611 (NM_020831)     | ggaggccagtgatc/ATCCTGCCTGCCCG CCAAAG               | cgagctcgatggatcccta/AGGGTCTATGTGGT TGGTGGCTGG      |
| pGADT7-human MRTF-A/MKL1 res. 288-514 (NM_020831)     | ggaggccagtgatc/ATCCTGCCTGCCCG CCAAAG               | cgagctcgatggatcccta/CCCCCAGGGCTC AGGCAAC           |
| pGADT7-human MRTF-A/MKL1 res. 347-611 (NM_020831)     | ggaggccagtgatc/CTGGACGACATGAAG GTGGCAGAG           | Cgagctcgatggatcccta/AGGGTCTATGTGG TGGTGGCTGG       |
| pGADT7-human MRTF-A/MKL1 res. 382-611 (NM_020831)     | ggaggccagtgatc/GACCAATCAGCCCT GTGCCAGG             | cgagctcgatggatcccta/AGGGTCTATGTGG TGGTGGCTGG       |
| pGADT7-human MRTF-A/MKL1 res. 347-514 (NM_020831)     | ggaggccagtgatc/CTGGACGACATGAAG GTGGCAGAG           | cgagctcgatggatcccta/CCCCCAGGGCTC AGGCAAC           |

Vector specific sequence is written in lowercase letters. FL, full-length

**Table S2. Antibodies used for western blot analysis and immunostainings.**

| Antibody                                                                                             | Source                               | Code            | WB conc.  | IF conc. |
|------------------------------------------------------------------------------------------------------|--------------------------------------|-----------------|-----------|----------|
| Rabbit polyclonal anti-MYPN                                                                          | Yamamoto et al., 2013a <sup>1</sup>  | N/A             | 1:1000    |          |
| Rabbit polyclonal anti-PALLD 621                                                                     | Pogue-Geile, 2006 <sup>2</sup>       | N/A             | 1:500     | 1:30     |
| Rabbit polyclonal anti-CARP/Ankrd1                                                                   | Proteintech                          | Cat# 11427-AP   | 1:1000    | 1:20     |
| Mouse monoclonal anti- $\alpha$ -actinin (Clone EA-53)                                               | Sigma-Aldrich                        | Cat# A7811      | 1:50.000  | 1:250    |
| Rabbit polyclonal anti-Cypher                                                                        | Zhou et al., 2013 <sup>3</sup>       | N/A             |           | 1:50     |
| Rabbit polyclonal anti-desmin                                                                        | Abcam                                | Cat# Ab8592     |           | 1:80     |
| Rabbit polyclonal anti-MRTF-A/MKL1                                                                   | Sigma-Aldrich                        | Cat# AV37504    |           | 1:30     |
| Mouse monoclonal anti-ubiquitinated proteins (clone FK2)                                             | Merck Millipore                      | Cat# 04-263     | 1:1000    |          |
| Mouse monoclonal anti-puromycin (clone 12D10)                                                        | Merck Millipore                      | Cat# MABE343    | 1: 25.000 |          |
| Rabbit polyclonal anti-IGF-I Receptor $\beta$                                                        | Cell Signaling Technology            | Cat# 3027       | 1:500     |          |
| Rabbit polyclonal anti-AKT-Thr308                                                                    | Cell Signaling Technology            | Cat# 2965       | 1:500     |          |
| Rabbit polyclonal anti-AKT-Ser473                                                                    | Cell Signaling Technology            | Cat# 4060       | 1:500     |          |
| Rabbit polyclonal anti-AKT                                                                           | Cell Signaling Technology            | Cat# 9272       | 1:1000    |          |
| Rabbit polyclonal anti-p4E-BP1-Thr70                                                                 | Cell Signaling Technology            | Cat# 9455       | 1:500     |          |
| Rabbit polyclonal anti-4E-BP1                                                                        | Cell Signaling Technology            | Cat# 9644       | 1:500     |          |
| Rabbit polyclonal anti-pP70-S6K-Thr389                                                               | Cell Signaling Technology            | Cat# 9206       | 1:500     |          |
| Rabbit polyclonal anti-pP70-S6K-Thr421/Ser424                                                        | Cell Signaling Technology            | Cat# 9204       | 1:500     |          |
| Rabbit polyclonal anti-P70-S6K                                                                       | Cell Signaling Technology            | Cat# 2708       | 1:500     |          |
| Rabbit polyclonal anti-pS6-Ser235/236                                                                | Cell Signaling Technology            | Cat# 2211       | 1:500     |          |
| Rabbit polyclonal anti-pS6-Ser244/247                                                                | Thermo Fisher Scientific             | Cat# 44-923G    | 1:500     |          |
| Rabbit polyclonal anti-S6                                                                            | Cell Signaling Technology            | Cat# 2317       | 1:500     |          |
| Rabbit polyclonal anti-GSK3 $\beta$ -S9                                                              | Cell Signaling Technology            | Cat# 5558       | 1:500     |          |
| Rabbit polyclonal anti-GSK3 $\beta$                                                                  | Cell Signaling Technology            | Cat# 9315       | 1:1000    |          |
| Rabbit polyclonal anti-Cyclin D1                                                                     | Cell Signaling Technology            | Cat# 2922       | 1:500     |          |
| Rabbit polyclonal anti-pP38-Thr180/Tyr182                                                            | Cell Signaling Technology            | Cat# 4631       | 1:500     |          |
| Rabbit polyclonal anti-P38                                                                           | Santa Cruz Biotechnology             | Cat# 7972       | 1:500     |          |
| Rabbit polyclonal anti-pErk1/2-Thr202/Tyr204                                                         | Cell Signaling Technology            | Cat# 4370       | 1:500     |          |
| Rabbit polyclonal anti-Erk1/2                                                                        | Santa Cruz Biotechnology             | Cat# sc-514302  | 1:1000    |          |
| Rabbit polyclonal anti-pJNK-Thr183/Tyr185 (G-7)                                                      | Santa Cruz Biotechnology             | Cat# sc-6254    | 1:500     |          |
| Rabbit polyclonal anti-JNK (D-2)                                                                     | Santa Cruz Biotechnology             | Cat# sc-7345    | 1:500     |          |
| Rabbit polyclonal anti-pPAK1-Ser144/PAK2-Ser141                                                      | Cell Signaling Technology            | Cat# 2606       | 1:500     |          |
| Rabbit polyclonal anti-PAK1                                                                          | Cell Signaling Technology            | Cat# 2602       | 1:1000    |          |
| Rabbit polyclonal anti-Cdc42                                                                         | Cell Signaling Technology            | Cat# 2466       | 1:500     |          |
| Rabbit polyclonal anti-Rac1/2/3                                                                      | Cell Signaling Technology            | Cat# 2465       | 1:500     |          |
| Rabbit polyclonal anti-pCofilin-Ser3                                                                 | Cell Signaling Technology            | Cat# 3313       | 1:500     |          |
| Rabbit polyclonal anti-Cofilin                                                                       | Cell Signaling Technology            | Cat# 3318       | 1:500     |          |
| Rabbit monoclonal anti-SRF (G-20)                                                                    | Santa Cruz Biotechnology             | Cat# sc-335     | 1:1000    |          |
| Rabbit polyclonal anti-pSMAD1/5-Ser463/465/9-Ser465/467                                              | Cell Signaling Technology            | Cat# 9511       | 1:500     |          |
| Rabbit polyclonal anti-MAFbx/Atrogin 1                                                               | Santa Cruz Biotechnology             | Cat# sc-27644   | 1:500     |          |
| Rabbit polyclonal anti-LC3B                                                                          | Sigma-Aldrich                        | Cat# L7543      | 1:500     |          |
| Rabbit polyclonal anti-pAMPK $\alpha$ -Thr172                                                        | Cell Signaling Technology            | Cat# 2535       | 1:500     |          |
| Rabbit polyclonal anti-AMPK $\alpha$                                                                 | Cell Signaling Technology            | Cat# 2532       | 1:500     |          |
| Rabbit polyclonal anti-PAX7                                                                          | Developmental studies hybridoma bank | Cat# PAX7       | 1:500     |          |
| Rabbit polyclonal anti-Myf5 (C-20)                                                                   | Santa Cruz Biotechnology             | Cat# sc-302     | 1:500     |          |
| Rabbit polyclonal anti-MyoD (M-318)                                                                  | Santa Cruz Biotechnology             | Cat# sc-760     | 1:500     |          |
| Mouse monoclonal anti-Myogenin                                                                       | Developmental studies hybridoma bank | Cat# F5D        | 1:500     |          |
| Rabbit polyclonal anti-laminin                                                                       | Sigma-Aldrich                        | Cat# L9393      |           | 1:50     |
| Mouse monoclonal anti-Myosin heavy chain, all but 2x                                                 | Developmental studies hybridoma bank | Cat# BF-35      |           | 1:10     |
| Mouse monoclonal anti-Myosin heavy chain 2A                                                          | Developmental studies hybridoma bank | Cat# SC-71      |           | 1:1      |
| Mouse monoclonal anti-Myosin heavy chain 2B                                                          | Developmental studies hybridoma bank | Cat# BF-F3      |           | 1:10     |
| Mouse monoclonal anti-Myosin heavy chain (Slow)                                                      | Leica Biosystems (Novocastra)        | Cat# NCL-MHCs   |           | 1:20     |
| Rabbit polyclonal anti-HA                                                                            | Sigma-Aldrich                        | Cat# H6908      | 1: 1000   |          |
| Mouse monoclonal anti-FLAG (clone M2)                                                                | Sigma-Aldrich                        | Cat# F3165      | 1: 20.000 |          |
| Rabbit monoclonal anti- $\alpha$ -tubulin                                                            | Abcam                                | Cat# Ab176560   | 1:4000    |          |
| Goat polyclonal anti- $\alpha$ -actin                                                                | Santa Cruz Biotechnology             | Cat# sc-1615    | 1:2000    |          |
| Rabbit polyclonal anti-GAPDH                                                                         | Proteintech                          | Cat# 10494-1-AP | 1: 15.000 |          |
| Goat anti-mouse IgG (H + L) Highly-cross Adsorbed Secondary antibody, Alexa Fluor 488-conjugated IgG | Thermo Fisher Scientific             | Cat# A11029     | 1:500     |          |
| Goat anti-rabbit IgG (H + L) Highly-cross Adsorbed Secondary antibody, Alexa Fluor 488               | Thermo Fisher Scientific             | Cat# A11034     | 1:500     |          |
| Goat anti-mouse IgG (H + L) Highly-cross Adsorbed Secondary antibody, Alexa Fluor 568                | Thermo Fisher Scientific             | Cat# A11031     | 1:500     |          |
| Goat anti-rabbit IgG (H + L) Highly-cross Adsorbed Secondary antibody, Alexa Fluor 568               | Thermo Fisher Scientific             | Cat# A11036     | 1:500     |          |

|                                                                                        |                          |              |        |  |
|----------------------------------------------------------------------------------------|--------------------------|--------------|--------|--|
| Goat anti-mouse IgG (H + L) Highly-cross Adsorbed Secondary antibody, Alexa Fluor 647  | Thermo Fisher Scientific | Cat# A21236  | 1:500  |  |
| Goat anti-rabbit IgG (H + L) Highly-cross Adsorbed Secondary antibody, Alexa Fluor 647 | Thermo Fisher Scientific | Cat# A21245  | 1:500  |  |
| Goat anti-rabbit IgG Horseradish Peroxidase (HRP)                                      | Thermo Fisher Scientific | Cat# 31460   | 1:500  |  |
| Goat anti-mouse IgG-HRP                                                                | Thermo Fisher Scientific | Cat# 31430   | 1:500  |  |
| Donkey anti-goat IgG-HRP                                                               | Santa Cruz Biotechnology | Cat# sc-2020 | 1:2000 |  |

WB, western blot analysis; IF, immunofluorescence staining

## References

1. Yamamoto DL, Vitiello C, Zhang J, Gokhin DS, Castaldi A, Coulis G, et al. The nebulin SH3 domain is dispensable for normal skeletal muscle structure but is required for effective active load bearing in mouse. *J Cell Sci* 2013;**126**:5477-5489.
2. Pogue-Geile KL, Chen R, Bronner MP, Crnogorac-Jurcevic T, Moyes KW, Downen S, et al. Palladin mutation causes familial pancreatic cancer and suggests a new cancer mechanism. *PLoS Med* 2006;**3**:e516.
3. Zhou Q, Chu PH, Huang C, Cheng CF, Martone ME, Knoll G, et al. Ablation of Cypher, a PDZ-LIM domain Z-line protein, causes a severe form of congenital myopathy. *J Cell Biol* 2001;**155**:605-612.
